# Supplementary material for: Dieckol, Derived from the Edible Brown Algae Ecklonia cava, Attenuates Methylglyoxal-Associated Diabetic Nephropathy by Suppressing AGE–RAGE Interaction
Source: MDPI journal article supplement (doi:10.3390/antiox12030593), 2023-02-27
Supplement: s1 [file s1]

**Supplementary S1.**

Table S1. Antibody list

| <b>Antibody</b>   | <b>CAT NO.</b> | <b>Manufacturer</b>                           | <b>Size (kDa)</b> |
|-------------------|----------------|-----------------------------------------------|-------------------|
| RAGE              | MAB5328        | Millifore, Millierica, MA, USA                | 48                |
| Glo-1             | Ab96032        | Abcam, Cambrige, MA, USA                      | 21                |
| Nrf2              | 12721s         | Cell signaling, Danvers, MA, USA              | 98                |
| HO-1              | 43966S         | Cell signaling, Danvers, MA, USA              | 28                |
| NQO1              | ab34173        | Abcam, Cambrige, MA, USA                      | 31                |
| CAT               | 12980s         | Cell signaling, Danvers, MA, USA              | 60                |
| SOD1              | 2770s          | Cell signaling, Danvers, MA, USA              | 22                |
| Actin             | sc-47778       | Santa Cruz biotechnology, Santa Cruz, CA, USA | 45                |
| p-ERK             | 9101s          | Cell signaling, Danvers, MA, USA              | 42/44             |
| ERK               | 9102s          | Cell signaling, Danvers, MA, USA              | 42/44             |
| p-JNK             | 9251s          | Cell signaling, Danvers, MA, USA              | 46/54             |
| JNK               | 9252s          | Cell signaling, Danvers, MA, USA              | 46/54             |
| p-p38             | 9211s          | Cell signaling, Danvers, MA, USA              | 43                |
| P38               | 9212s          | Cell signaling, Danvers, MA, USA              | 40                |
| Bax               | 2774           | Cell signaling, Danvers, MA, USA              | 20                |
| Bcl-2             | 3498           | Cell signaling, Danvers, MA, USA              | 28                |
| Bcl-xL            | 2762           | Cell signaling, Danvers, MA, USA              | 30                |
| Cleaved caspase-3 | 9661           | Cell signaling, Danvers, MA, USA              | 17/19             |
| Cleaved caspase-7 | 8438           | Cell signaling, Danvers, MA, USA              | 18                |
